# Supplementary material for: Comparison of Two Solvers for Simulation of Single Bubble Rising Dynamics: COMSOL vs. Fluent
Source: MDPI journal article supplement (doi:10.3390/min11050452), 2021-04-25
Supplement: s1 [file s1]

Archive with 1 entries (1 files):
- minerals-1177765-supplementary.pdf
